# Supplementary material
Source: PubMed Central journal article supplement (PMC7483895)
Supplement: NIHMS1594912-supplement-1.pdf [file NIHMS1594912-supplement-1.pdf]

| <b>Gene</b> | <b>qRT-PCR forward primers (5' - 3')</b> | <b>qRT-PCR reverse primers (3' - 5')</b> |
|-------------|------------------------------------------|------------------------------------------|
| GFP         | ACGGCAAGCTGACCCTGAAG                     | GGGTGCTCAGGTAGTGGTTG                     |
| RPL13A      | CCTGGAGGAGAAGAGGAAAGAGA                  | TTGAGGACCTCTGTGTATTTGTCAA                |
| FOXO1       | GGATGTGCATTCTATGGTGTACC                  | TTTCGGGATTGCTTATCTCAGAC                  |
| FOXO3       | ACGGCTGACTGATATGGCAG                     | CGTGATGTTATCCAGCAGGTC                    |
| FOXO4       | GGCTGCCGCGATCATAGAC                      | GGCTGGTTAGCGATCTCTGG                     |
| ATG2A       | GCTCAGGGTACATGGAGCTG                     | CTCGTGGTCTGTAAGGCTCAC                    |
| ATG9A       | CTGCCCTTCCGTATTGCAC                      | CTCACGTTTGTGGATGCAGAT                    |
| ATG13       | TTGCTATAACTAGGGTGACACCA                  | CCCAACACGAACTGTCTGGA                     |
| ULK1        | GGCAAGTTCGAGTTCTCCCG                     | CGACCTCCAAATCGTGCTTCT                    |
| RB1CC1      | ATCGAAGAGTGTGTACCTACAGT                  | GCAGGTGGACGATCACATAAGAT                  |
| NBR1        | AGATGGCAGTTAAACAGGGAAAC                  | GTGGGGCTTCATCAACGACA                     |
| CTSF        | CCCTCCAATGCCTACTCGG                      | CCAGCTTCTGCTCGTTCTG                      |
| ATF4        | CCCTCCACCTTCTRACAACCTC                   | TGCCCAGCTCTAAACTAAAGGA                   |
| HSPA5       | TGCAGCAGGACATCAAGTTC                     | AGTTCAGCGTCTTTGGTTG                      |
| DDIT3       | AGAACCAGGAAACGGAAACAGA                   | TCTCCTTCATGCGCTGCTTT                     |
| ASNS        | TGCACGCCCTCTATGACAAAT                    | CACCTTTCTAGCAGCCAGTA                     |

**Table S1. qRT-PCR primer list.**
